# Supplementary material for: Associations between vascular health, brain stiffness and global cognitive function
Source: PubMed Central journal article supplement (PMC10950054; doi:10.1093/braincomms/fcae073), 2024-02-29
Supplement: fcae073_supplementary_data.pdf [file fcae073_supplementary_data.pdf]

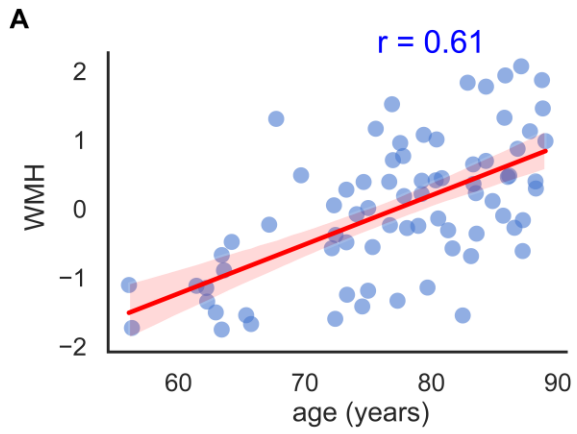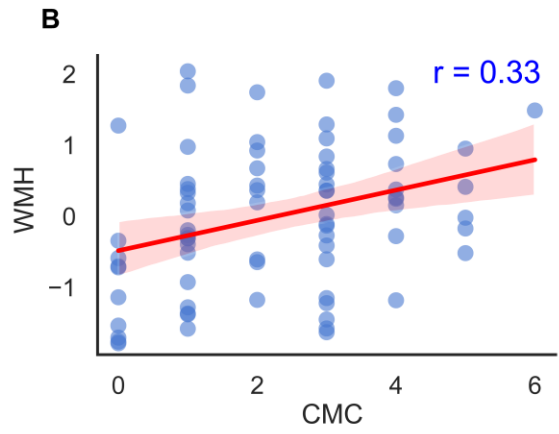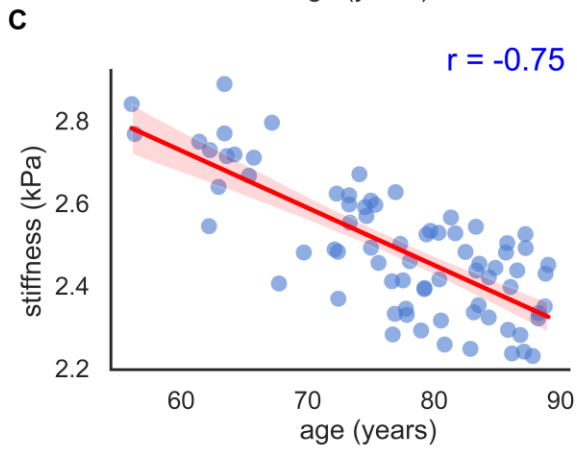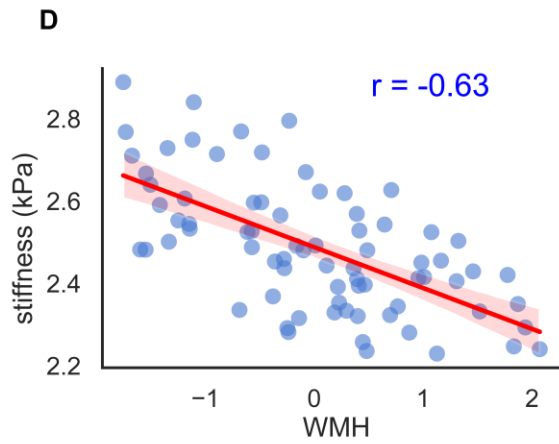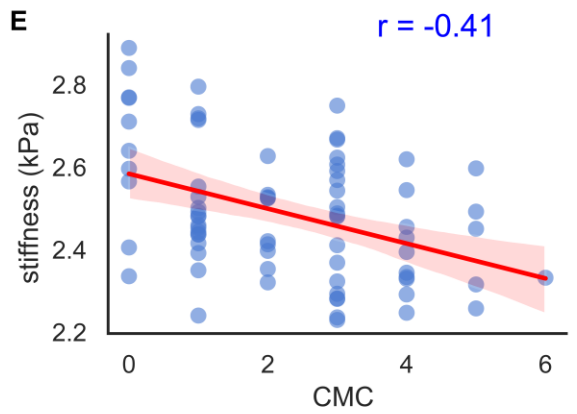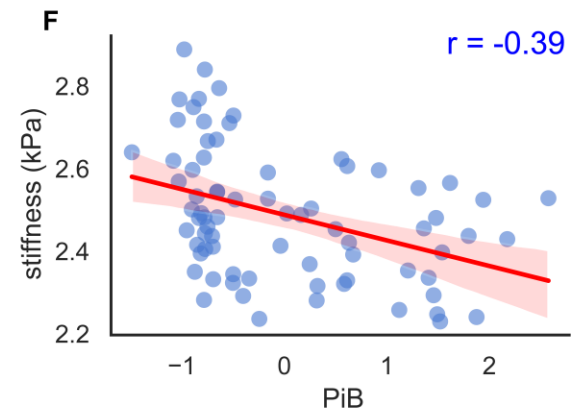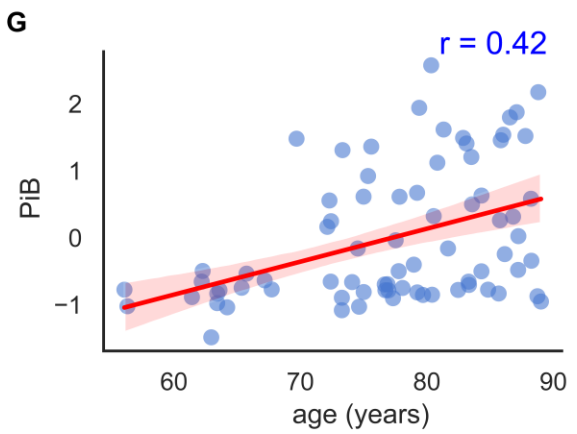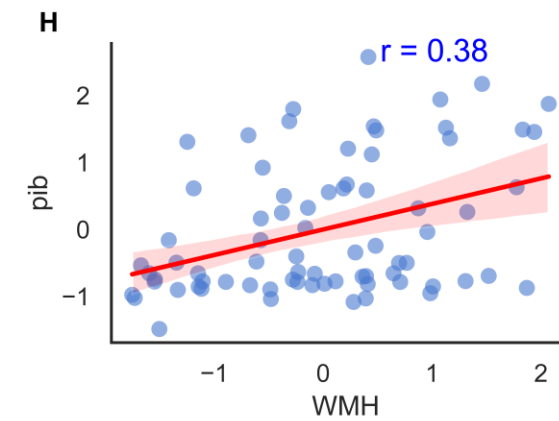

**Supplementary Figure 1: Pearson correlations between the continuous variables. (A), (B)** WMH versus age and CMC. **(C), (D), (E)** and **(F)** stiffness versus age, WMH, CMC and PiB. **(G), (H)** PiB versus age and WMH respectively. 'r' represents the Pearson correlation coefficient.

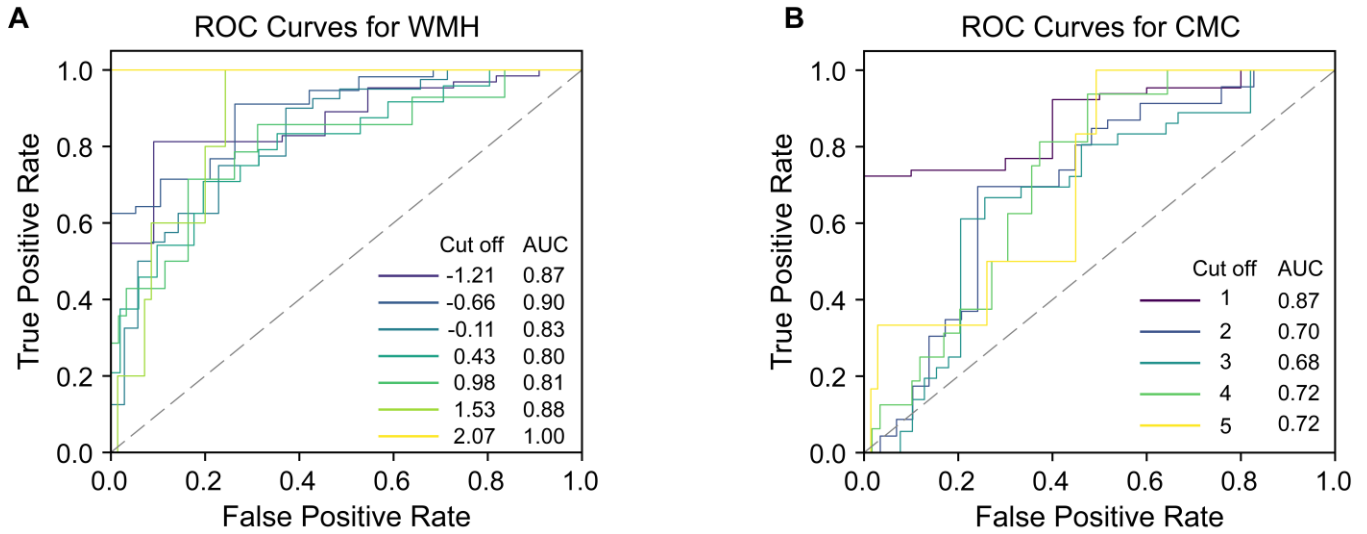

**Supplementary Figure 2: Diagnostic accuracy of MRE stiffness for WMH and CMC. (A)** Receiver Operator Characteristics for WMH illustrating the true positive rate (sensitivity) against the false positive rate (1-specificity) as the classification threshold for WMH varies. The diagonal line represents a random guess model, while our logistic regression model with age, sex, stiffness, CMC, and amyloid load as predictors lies above this line, indicating a better than random guessing performance. The Area Under Curve (AUC) of >80 suggests a good ability of the model to discriminate between the high and low WMH score groups. **(B)** Receiver Operator Characteristics for CMC at various thresholds. AUC >70 suggests an acceptable ability of the model to discriminate between low and high CMC using age, sex, brain stiffness, WMH and amyloid load as predictors.
